# Supplementary material for: Staying afloat: community perspectives on health system resilience in the management of pregnancy and childbirth care during floods in Cambodia
Source: PubMed Central journal article supplement — BMJ Glob Health. 2020 Apr 23;5(4):e002272. doi: 10.1136/bmjgh-2019-002272 (PMC7204936; doi:10.1136/bmjgh-2019-002272), 2020-04-23
Supplement: bmjgh-2019-002272supp001.pdf [file bmjgh-2019-002272supp001.pdf]

**Annex 1.** Topic guide in English and Khmer for focus group discussions and semi-structured interviews**Flood experiences**

*Give example of recent flood in the area and confirm event (when, where, length of flood). What happened during this flood?*

*Explore:* Effect on village and health, other recent floods

**Care seeking and management of health needs**

How do women take care of their pregnancy during a flood? What do women do when they give birth during a flood?

*Explore:* Health center, private providers, spiritual healers, traditional medicine, traditional birth attendants, role of family, baby's father, boats and transport, delivering at home, community-based programs from health center during floods

How do floods change the prenatal care women can get? How do floods change the delivery care women can get?

*Explore:* Reasons for changes, change in quality of care, supplies, medicines, and providers, cost, access and availability

Is the way women manage their pregnancy during floods different if you compare...? What about for deliveries?

a) Women who are richer with women who are poorer, b) First child or multiple children, c) Grew up in this district or from another district, d) Complicated or uncomplicated pregnancy, e) Early in the pregnancy versus last month of the pregnancy

**Anticipating and coping with uncertainty**

When a woman is pregnant, how does she prepare for the rainy season?

*Explore:* Beginning compared to end of pregnancy, transport and boats, money, spiritual or traditional medicine practices

What does a woman do if there is a problem with her pregnancy during a flood? What does she do if there is a problem during the birth and there is a flood?

*Explore:* Care seeking by type of provider and reasons why, decision to seek care, referrals to hospital

**External factors influencing the health system**

What makes it easier for women to manage their pregnancy or birth during floods? What makes it harder?

Can you describe a time when a woman was not able to get prenatal care during a flood? What happened?

What about a time when a woman was not able to get delivery care? What happened then?

**Interaction with the community**

What are some reasons that women visit \_\_\_\_\_ providers for prenatal care during floods? What are some reasons that women visit \_\_\_\_\_ when she delivers a baby during a flood?

*Explore:* Public providers, private providers, traditional birth attendants, drug shops, traditional medicine providers, other

How do you think the pregnant women feel about the prenatal care that they can get during floods? How do you think pregnant women feel about the delivery care they can get during floods?

*Explore:* Trust in provider, attention, convenience, and quality of services, feeling of ownership

**Gathering and using knowledge**

How do women decide what kind of prenatal care they will get during floods? How do they decide what kind of delivery care they will get?

*Explore:* Sources of information, social media and how they communicate with others, ability to make decisions

Who do women talk to about prenatal care during floods? Who do they talk to about delivery care during floods?

*Explore:* Interaction with providers, traditional birth attendants, spiritual healers, traditional medicine, family and community

What is an example of something that all women in this village should know about managing their pregnancy during floods? ...for delivering a baby?

**បទពិសោធន៍ទឹកជំនន់**

ឲ្យទាហានណែនាំទឹកជំនន់កើតឡើងថ្មីៗនេះ និងបញ្ជាក់ពីព្រឹត្តិការណ៍នេះ (នៅពេលណា, ទីណា, រយៈពេលរបស់ទឹកជំនន់). តើមានអ្វីកើតឡើងកំឡុងពេលទឹកជំនន់នេះ?

ជជែក៖ ផលប៉ះពាល់ក្នុងភូមិ និងសុខភាព; ទឹកជំនន់ដែលទើបកើតឡើងថ្មីៗផ្សេងទៀត

**ការស្វែងរកការថែទាំ និងការគ្រប់គ្រងលើតម្រូវការសុខភាព**

តើស្រ្តីថែទាំផ្ទៃពោះមុនសម្រាលយ៉ាងដូចម្តេចនៅកំឡុងពេលទឹកជំនន់? តើស្រ្តីធ្វើយ៉ាងដូចម្តេចនៅពេលពួកគាត់សម្រាលកូនកំឡុងពេលទឹកជំនន់?

ជជែក៖ មណ្ឌលសុខភាព អ្នកផ្តល់សេវាឯកជន គ្រូព្រលឹងបុរាណ វិសេសបុរាណ ធុបុរាណ, នាទីគ្រួសារ, ឪពុករបស់ក្មេង, ទូក និងការធ្វើដំណើរផ្សេងទៀត, ការសម្រាលនៅផ្ទះ, កម្មវិធីផ្តោតលើសហគមន៍ពីមណ្ឌលសុខភាពកំឡុងពេលទឹកជំនន់

តើទឹកជំនន់ផ្លាស់ប្តូរការថែទាំមុនសម្រាលដែលស្រ្តីអាចទទួលបាន យ៉ាងដូចម្តេច? តើទឹកជំនន់ផ្លាស់ប្តូរការថែទាំពេលសម្រាលដែលស្រ្តីអាចទទួលបាន យ៉ាងដូចម្តេច?

ជជែក៖ មូលហេតុនៃការផ្លាស់ប្តូរ, ការផ្លាស់ប្តូរនូវគុណភាពការថែទាំ, ការផ្គត់ផ្គង់ ថ្នាំ និងអ្នកផ្តល់សេវា, តំលៃ, ការទទួលបានការថែទាំ និងការថែទាំដែលមានស្រាប់

តើវិធីដែលស្រ្តីប្រើក្នុងការថែទាំមុនសម្រាលរបស់ពួកគេកំឡុងពេលមានទឹកជំនន់ខុសគ្នាទេ ប្រសិនបើអ្នកប្រៀបធៀប...?

a) ស្រ្តីជាអ្នកមាន ជាមួយនឹង ស្រ្តីជាអ្នកក្រ b) កូនដំបូង ឬ កូនច្រើន c) អ្នកកើតក្នុងស្រុកនេះ(អ្នកចំណូលចាស់) ឬ អ្នកមកពីស្រុកផ្សេង (ចំណូលថ្មី) d) ការពរពោះស្មុគ្រស្មាញ(មានបញ្ហាសុខភាពដោយសារផ្ទៃពោះ)ឬមិនស្មុគ្រស្មាញ e) ជជែក៖ ផ្ទៃពោះខ្លីដំបូងៗ vs ផ្ទៃពោះខ្លីចុងក្រោយ

**ការរំពឹងទុក និងការសម្របទៅតាមភាពមិនច្បាស់លាស់**

នៅពេលស្រ្តីមានផ្ទៃពោះ តើគាត់ត្រូវម្នួនយ៉ាងដូចម្តេចសម្រាប់រដូវវស្សា?

ជជែក៖ ទើបមានផ្ទៃពោះ ប្រៀបធៀបនឹងការពរពោះនៅខែចុងក្រោយ, ការធ្វើដំណើរ និងទូក, ទឹកប្រាក់, ការប្រើថ្នាំបុរាណ ឬការអនុវត្តព្រលឹងផ្សេងៗ (អាគម)

តើស្រ្តីធ្វើយ៉ាងដូចម្តេចប្រសិនបើមានបញ្ហាអ្វីមួយកើតឡើងជាមួយនឹងការពរពោះរបស់គាត់កំឡុងពេលទឹកជំនន់? តើស្រ្តីធ្វើដូចម្តេចប្រសិនបើមានបញ្ហាអ្វីមួយកើតឡើងក្នុងពេលសម្រាលកូនកំឡុងពេលមានទឹកជំនន់?

ជជែក៖ ការស្វែងរកការថែទាំផ្តល់ដោយអ្នកផ្តល់សេវាផ្សេងៗ និងមូលហេតុ, ការសម្របចិត្តក្នុងការស្វែងរកការថែទាំ, ពីពេទ្យបង្អែក ទៅមន្ទីរពេទ្យ

**កត្តាខាងក្រៅដែលជះឥទ្ធិពលលើប្រព័ន្ធសុខភាព**

តើអ្វីដែលធ្វើឲ្យស្រ្តីមានភាពងាយស្រួលជាងមុនក្នុងការថែរក្សាផ្ទៃពោះ ឬពេលសម្រាលកូនរបស់គាត់កំឡុងពេលទឹកជំនន់? តើអ្វីដែលធ្វើឲ្យពិបាកជាងមុន?

តើអ្នកអាចរៀបរាប់ពេលដែលស្រ្តីមិនអាចទទួលបានការថែទាំមុនសម្រាលកំឡុងពេលទឹកជំនន់បានទេ?

ចុះមានពេលដែលស្រ្តីមិនអាចទទួលបានការថែទាំពេលសម្រាលទេ? មានអ្វីកើតឡើងពេលនោះ?

**ទំនាក់ទំនងជាមួយនឹងសហគមន៍**

តើមានមូលហេតុអ្វីខ្លះដែលស្រ្តីទៅរក.....ដែលជាអ្នកផ្តល់សេវាថែទាំមុនសម្រាលកំឡុងពេលទឹកជំនន់? តើមានមូលហេតុអ្វីខ្លះដែលស្រ្តីទៅរក  
.....ដែលជាអ្នកផ្តល់សេវាថែទាំពេលសម្រាលកូនកំឡុងពេលទឹកជំនន់?

ជជីក៖ អ្នកផ្តល់សេវារដ្ឋ អ្នកផ្តល់សេវាឯកជន ធុបបុរាណ ហាងលក់ថ្នាំ គ្រូថ្នាំបុរាណ,ផ្សេងៗ

តើអ្នកគិតថាស្រ្តីមានផ្ទៃពោះមានអារម្មណ៍យ៉ាងណាអំពីការថែទាំមុនសម្រាលដែលពួកគេទទួលបានកំឡុងពេលទឹកជំនន់? តើអ្នកគិតថាស្រ្តីមានផ្ទៃពោះមាន  
អារម្មណ៍យ៉ាងណាអំពីការថែទាំពេលសម្រាលកូនដែលពួកគេទទួលបានកំឡុងពេលទឹកជំនន់?

ជជីក៖ ទំនុកចិត្តលើអ្នកផ្តល់សេវា ការយកចិត្តទុកដាក់ ភាពងាយស្រួល និងគុណភាពសេវា, អារម្មណ៍នៃភាពជាម្ចាស់

**ការប្រមូលផ្តុំ និងការប្រើប្រាស់ចំណេះដឹង**

តើស្រ្តីសម្រេចចិត្តក្នុងការជ្រើសយកប្រភេទនៃការថែទាំមុនសម្រាលណាមួយក្នុងពេលមានទឹកជំនន់បាន យ៉ាងដូចម្តេច? តើស្រ្តីសម្រេចចិត្តក្នុងការជ្រើសយក  
ប្រភេទសេវាថែទាំពេលសម្រាលកូនណាមួយក្នុងពេលមានទឹកជំនន់បាន យ៉ាងដូចម្តេច?

ជជីក៖ ប្រភពព័ត៌មាន, បណ្តាញសង្គម និងវីធីពួកគេទាក់ទងគ្នា, សមត្ថភាពក្នុងការសម្រេចចិត្ត

តើស្រ្តីនិយាយពីការថែទាំមុនសម្រាលកំឡុងពេលទឹកជំនន់ជាមួយអ្នកណា? តើស្រ្តីនិយាយពីការថែទាំពេលសម្រាលកូនកំឡុងពេលទឹកជំនន់ជាមួយអ្នកណា?

ជជីក៖ ការទាក់ទងជាមួយនឹងអ្នកផ្តល់សេវា, ធុបបុរាណ គ្រូព្រលឹងអាគម ថ្នាំបុរាណ, គ្រួសារ និងសហគមន៍

តើអ្វីដែលស្រ្តីគ្រប់រូបគួរតែដឹងក្នុងការថែទាំផ្ទៃពោះរបស់ពួកគេកំឡុងពេលទឹកជំនន់?...ចុះសម្រាប់ពេលសម្រាលកូនវិញ?
